# Supplementary material for: Tracing neuronal circuits in transgenic animals by transneuronal control of transcription (TRACT)
Source: eLife journal article supplement (doi:10.7554/elife.32027), 2017-12-06
Supplement: supp [file elife-32027-supp-v1.zip]

Archive with 9 entries (9 files):
- elife_poa_e32027_Figure_2_figure_supplement_6.docx
- elife_poa_e32027_Figure_2_figure_supplement_5.docx
- elife_poa_e32027_Figure_2_figure_supplement_2.docx
- elife_poa_e32027_Figure_2_figure_supplement_7.docx
- elife_poa_e32027_Figure_2_figure_supplement_4.docx
- elife_poa_e32027_Figure_2_figure_supplement_1.docx
- elife_poa_e32027_Transparent_Reporting_File.pdf
- elife_poa_e32027_Figure_2_figure_supplement_3.docx
- elife_poa_e32027_Figure_5_figure_supplement_1.docx
