# Supplementary material for: Tracing neuronal circuits in transgenic animals by transneuronal control of transcription (TRACT)
Source: eLife journal article supplement (doi:10.7554/elife.32027), 2017-12-06
Supplement: supp [file elife-32027-supp-v1.zip › elife_poa_e32027_Figure_2_figure_supplement_2.docx]

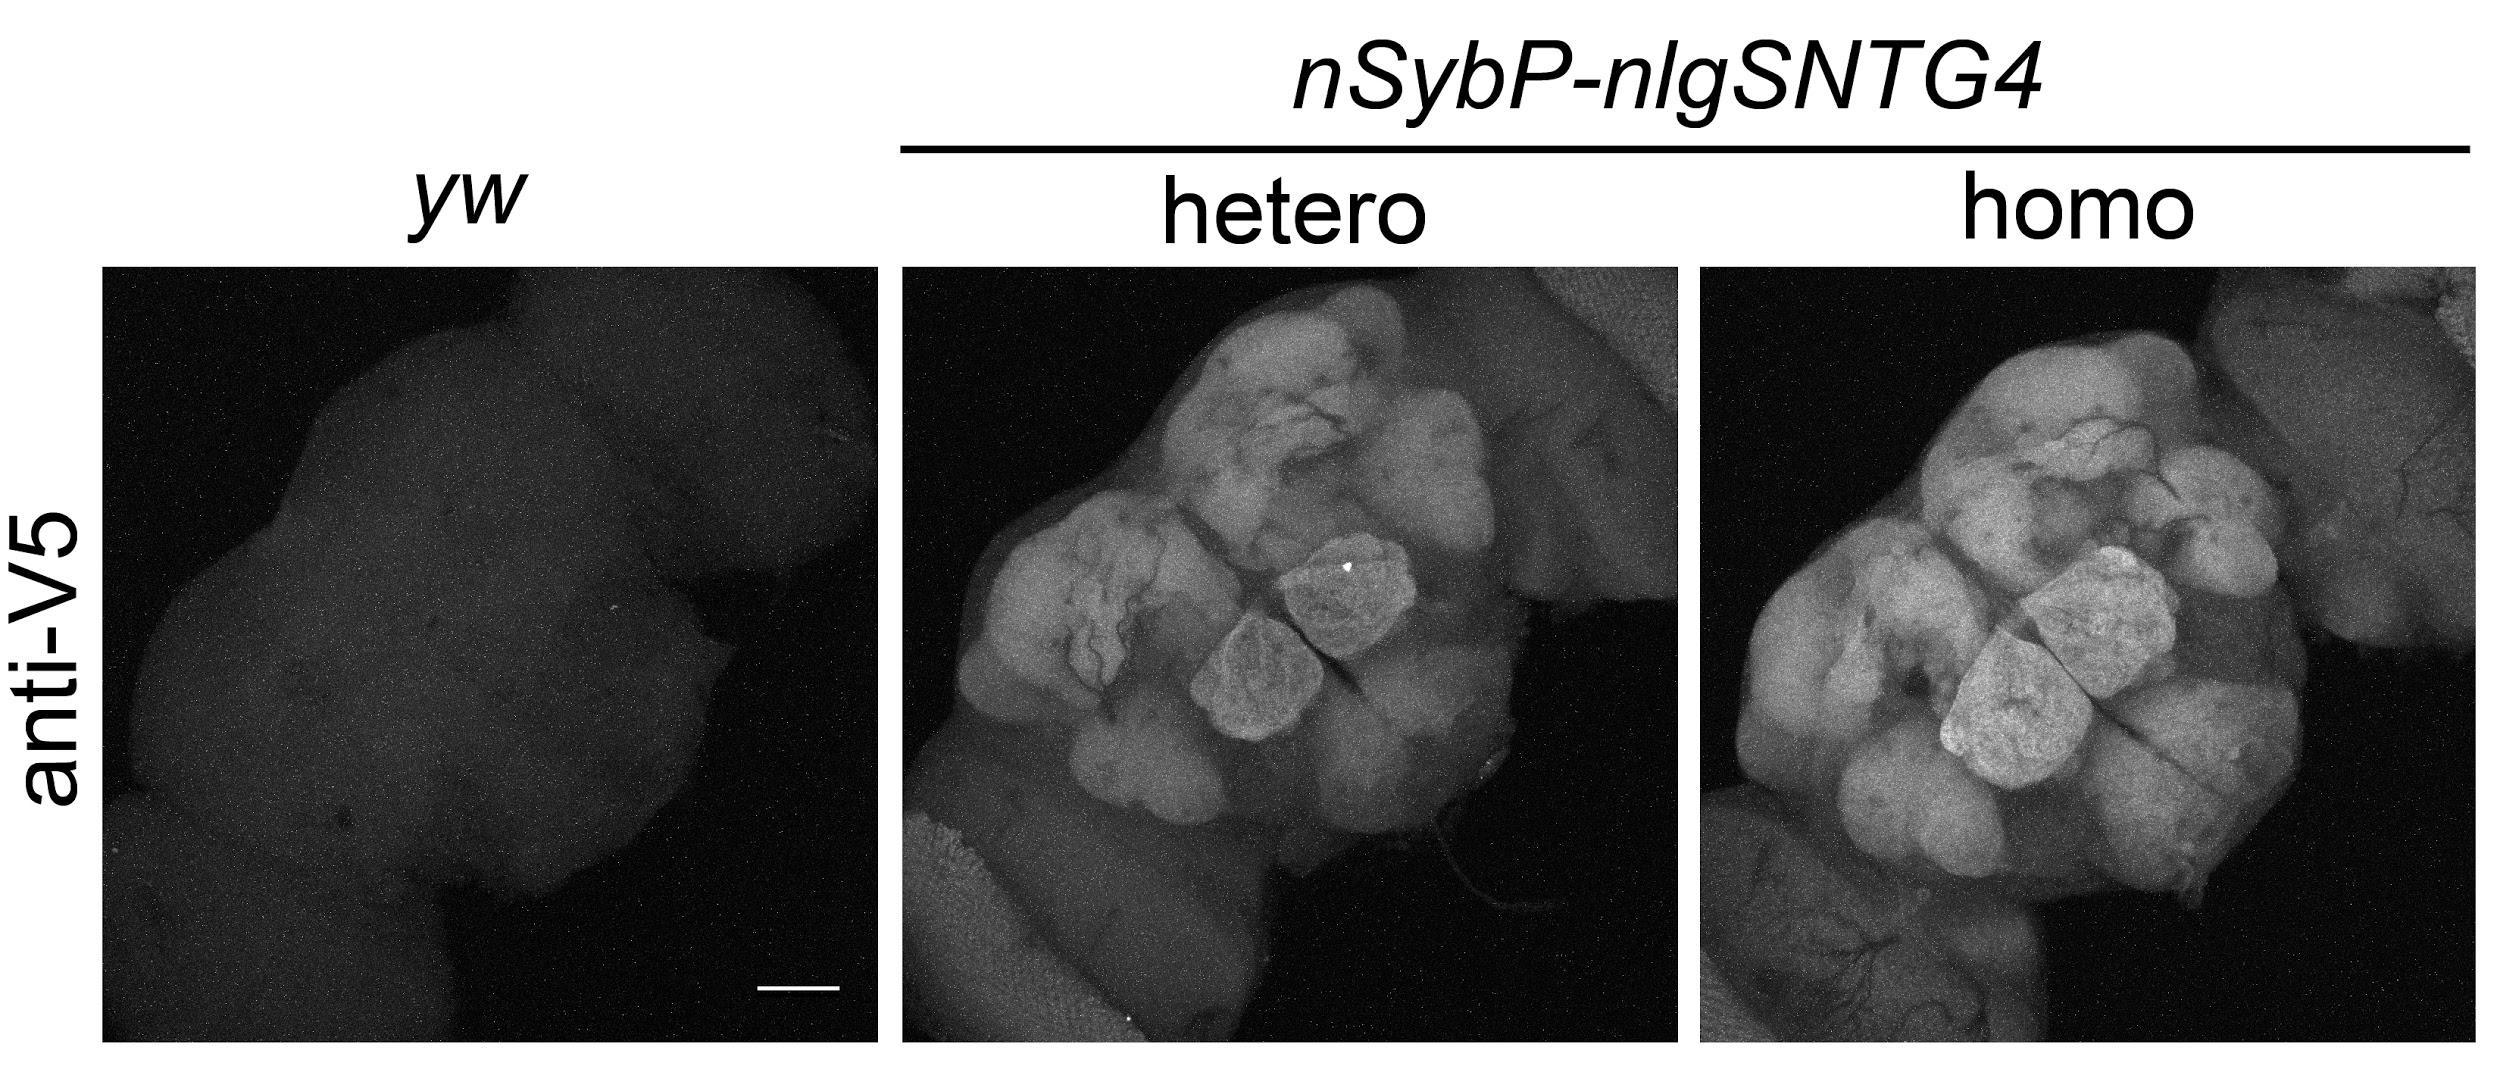


**Figure 2 - figure supplement 2: Expression of the nlgSNTG4 receptor under the SybE enhancer.**

The receptor nlgSNTG4 was tagged with the V5 epitope in its C terminus. Immunostaining with an anti-V5 antibody shows that the nlgSNTG4 receptor is highly expressed in the central brain, in regions such as antennal lobe and subesophageal ganglion, but its expression was much weaker in the optic lobe (bottom left and top right corners). The expression level of the receptor protein in the homozygote SybE-nlgSNTG4 (right) is higher than in the heterozygote (middle). Notice that the expression of the receptor is enriched in the neuropil regions. Scale bar=50 µm.
