# Supplementary material for: Tracing neuronal circuits in transgenic animals by transneuronal control of transcription (TRACT)
Source: eLife journal article supplement (doi:10.7554/elife.32027), 2017-12-06
Supplement: supp [file elife-32027-supp-v1.zip › elife_poa_e32027_Figure_2_figure_supplement_4.docx]

**
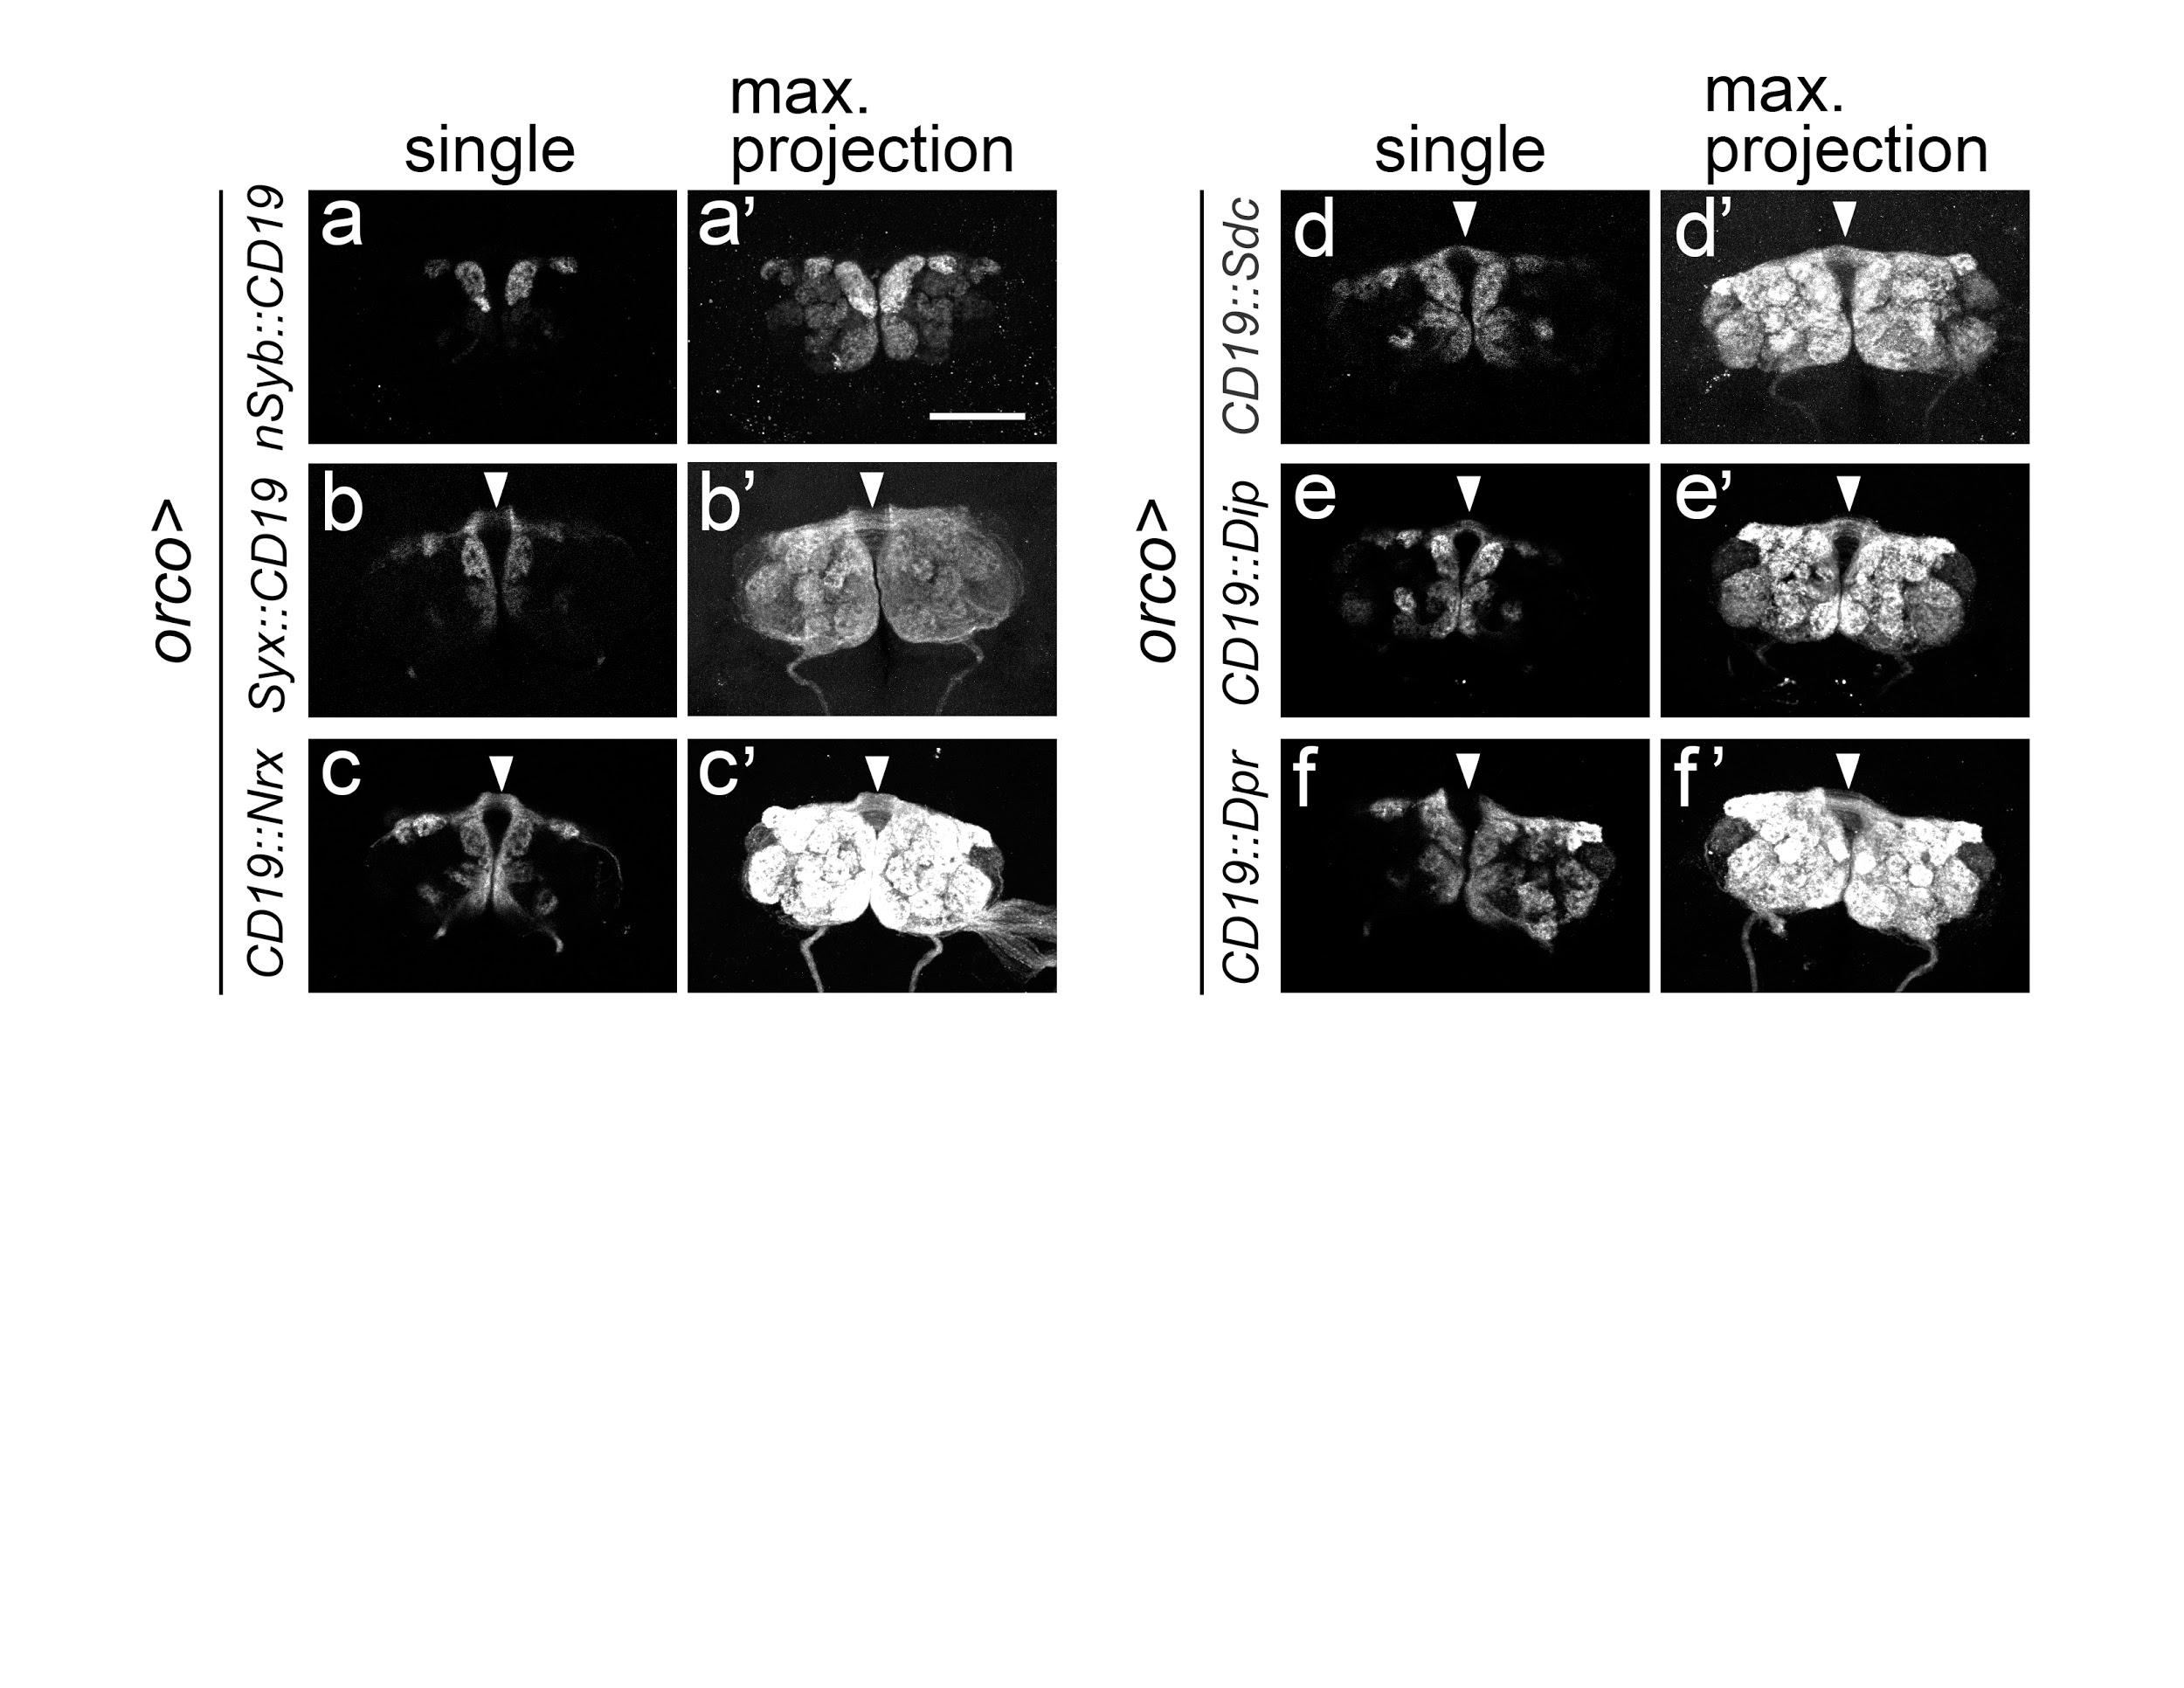
**

**Figure 2 -figure supplement 4: Expression of CD19 fused with different presynaptic proteins in ORNs.**

The ligand, CD19, was fused with domains from the following pre-synaptic markers: nSyb (a), syx (b), Nrx1 (c), Sdc (d), Dip (e) and Dpr (f). The distribution of the different ligands expressed in ORN axons driven by the *orco* driver is shown in single optic sections (a-f) or maximum projections (a’-f’). nSyb::CD19 (a and a’) was selectively accumulated at the presynaptic terminals and could not be detected along axons, thus allowing for the visualization of individual glomeruli. The other ligands (syx (b), Nrx1 (c), Sdc (d), Dip (e) and Dpr (f)) are homogeneously distributed throughout the surface of the axons, including axon shafts, thus allowing to detect the ligand on the antennal commissure (arrowheads in b-f and b’-f’). Scale bar= 50μm.
