# Supplementary material for: Tracing neuronal circuits in transgenic animals by transneuronal control of transcription (TRACT)
Source: eLife journal article supplement (doi:10.7554/elife.32027), 2017-12-06
Supplement: supp [file elife-32027-supp-v1.zip › elife_poa_e32027_Figure_2_figure_supplement_6.docx]

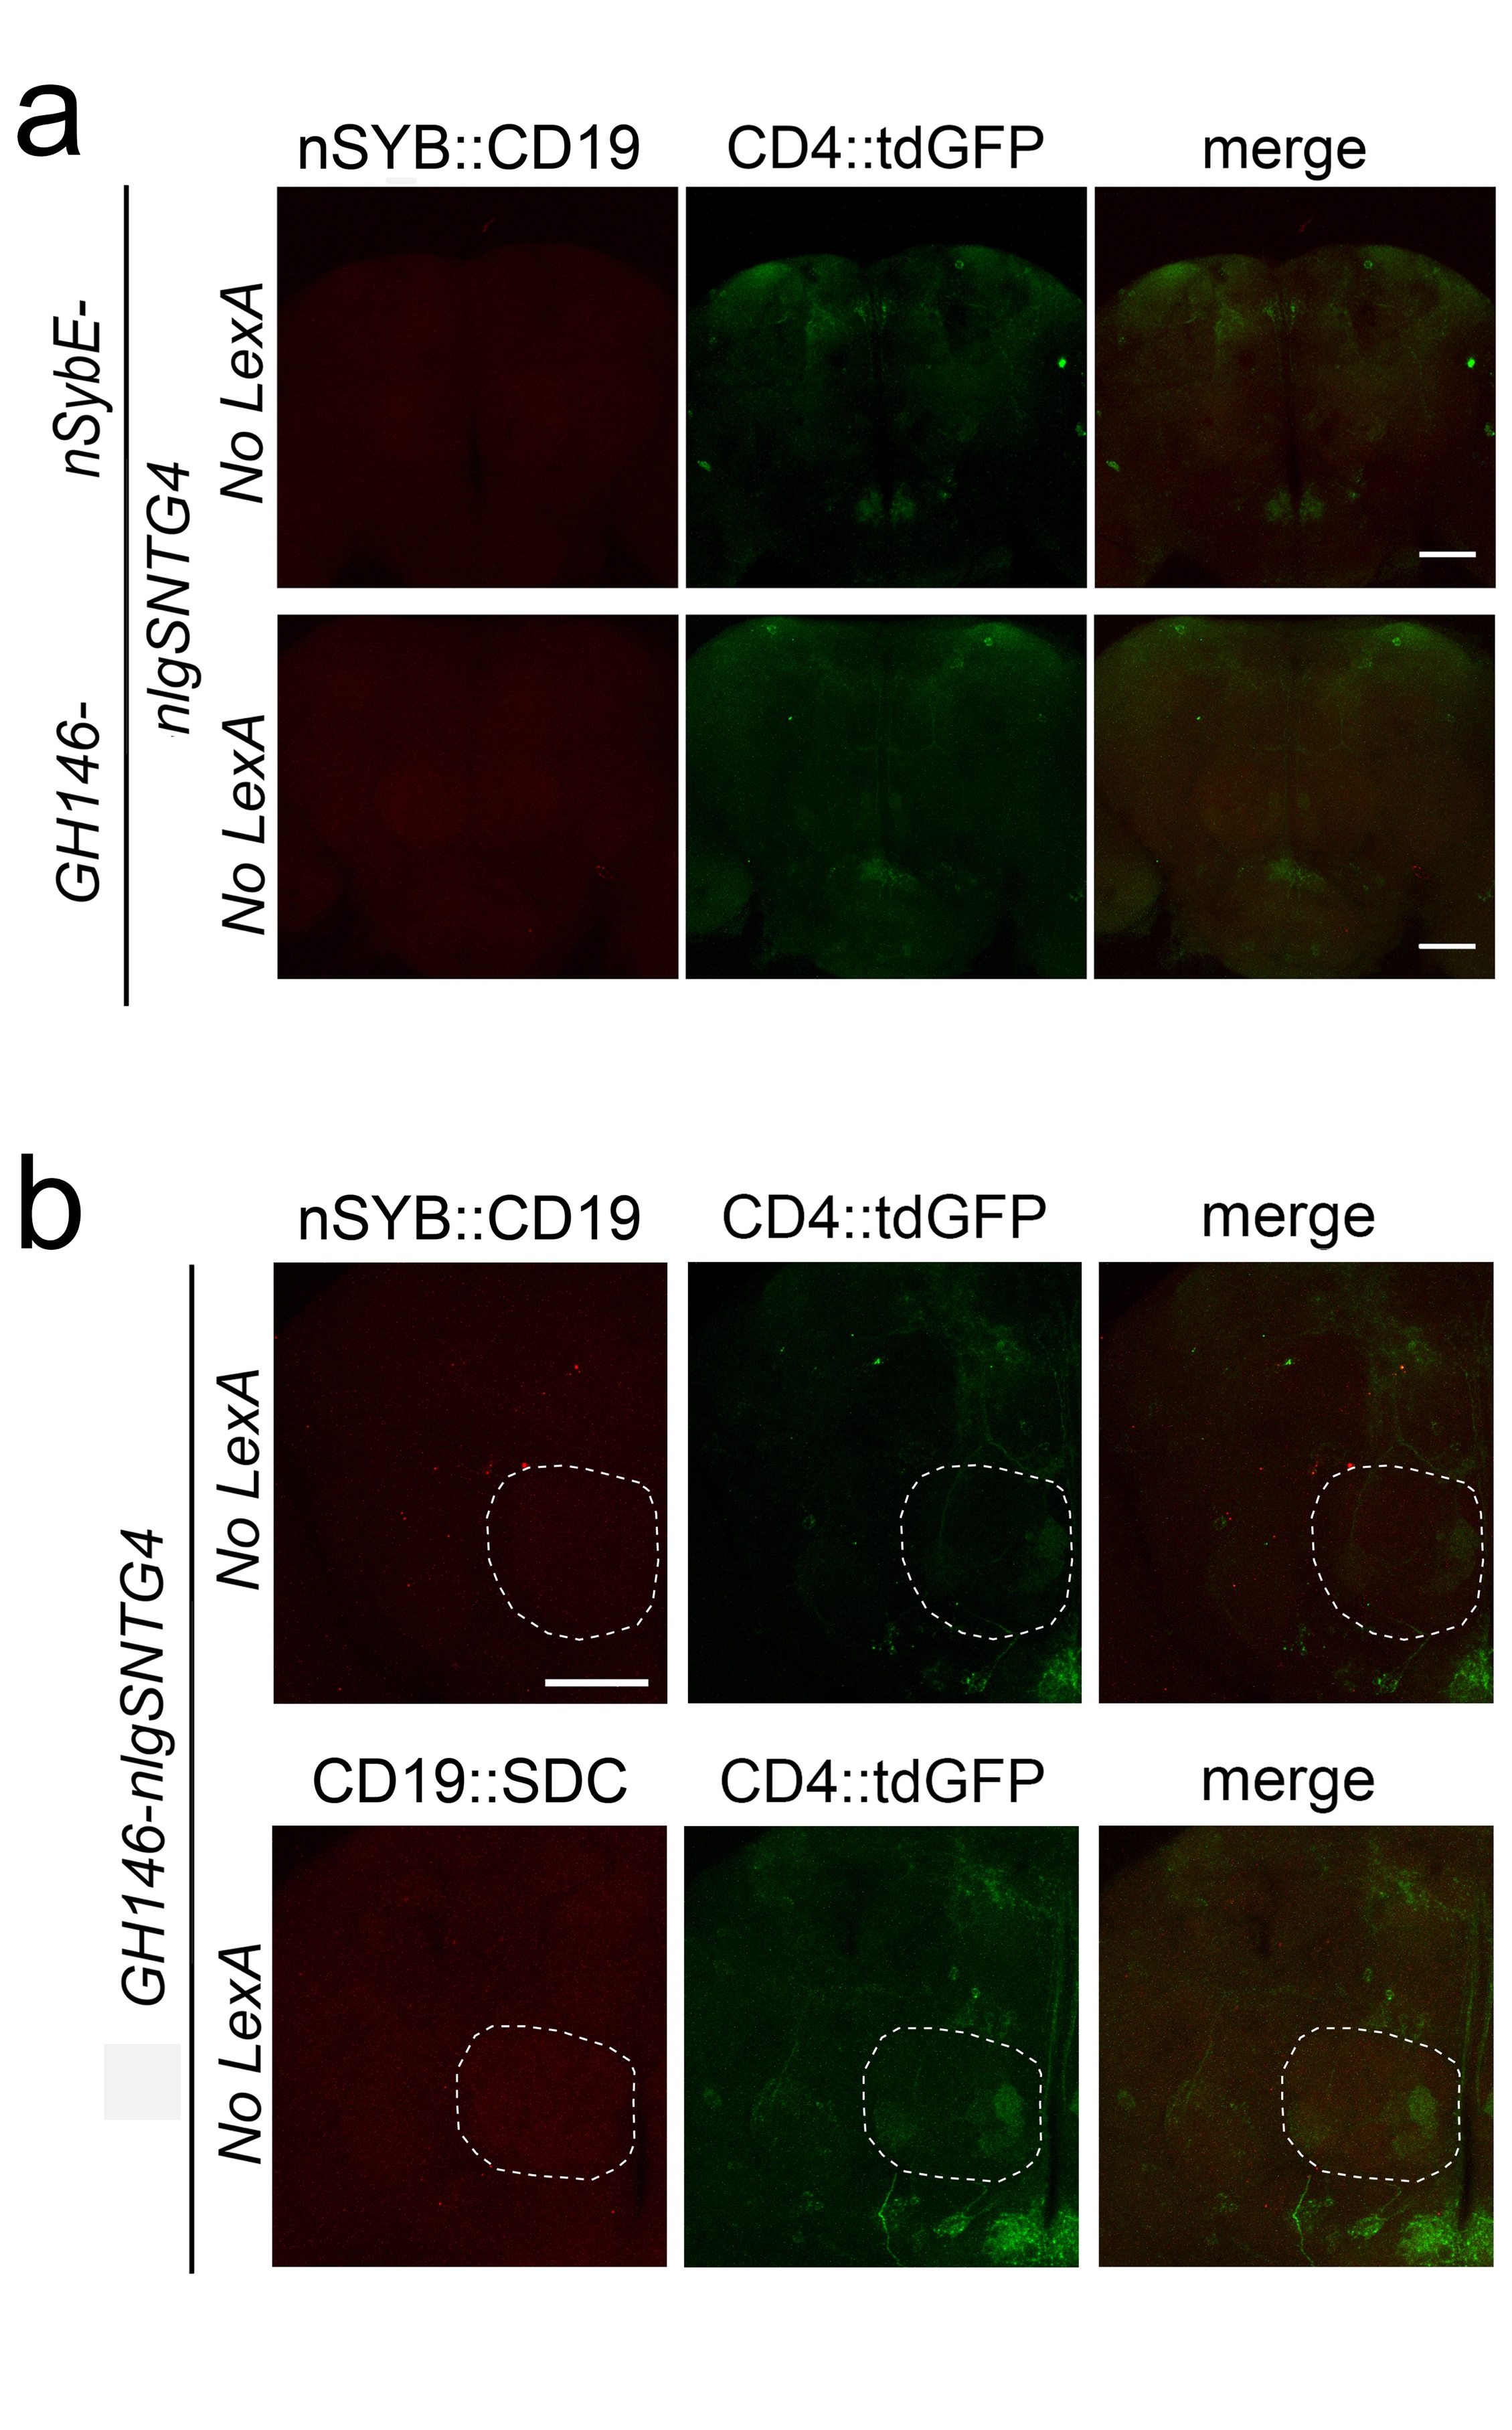


**Figure 2 - figure Supplement 6: Control brains without the lexA driver to assess the lvels mof ligand-independent background.**

(a) The confocal images show that the negative controls of Fig. 2e without lexA drivers (carrying nlgSNTG4 driven by the nSybE- (top panels) or GH146 enhancers (bottom panels), 5xUAS-CD4::tdGFP and LexAop-nSyb::CD19) have no induction in antennal lobe neurons. (b) The images show that control brains of Fig. 3 without LexA driver (carrying GH146-nlgSNTG4, 5xUAS-CD4::tdGFP and LexAop-nSyb::CD19 (top panels) or CD19::Sdc (bottom panels) have very low levels of ligand-independent background GFP expression in the antennal lobe (stippled circle). Scale bar= 50μm.
